# Supplementary material for: Elucidating the Effects of Curcumin against Influenza Using In Silico and In Vitro Approaches
Source: MDPI journal article supplement (doi:10.3390/ph14090880), 2021-08-30
Supplement: s1 [file s1]

**Supplementary Table S1. The structural similarity between the selected target structures used in docking and other structures of the same targets in PDB.**

| <b>Target proteins</b> | <b>The total number of amino acids in full-length protein</b> | <b>Selected target structures used in docking</b> | <b>The number of amino acids of selected targets</b> | <b>Other structures of the same targets in PDB</b> | <b>RMSD between selected targets and other structures of the same targets</b> | <b>The number of aligned amino acids in the RMSD calculation</b> |
|------------------------|---------------------------------------------------------------|---------------------------------------------------|------------------------------------------------------|----------------------------------------------------|-------------------------------------------------------------------------------|------------------------------------------------------------------|
| <b>AKT1</b>            | <b>480</b>                                                    | <b>3O96</b>                                       | <b>367</b>                                           | <b>4GV1</b>                                        | <b>1.181</b>                                                                  | <b>250</b>                                                       |
|                        |                                                               |                                                   |                                                      | <b>6HHF</b>                                        | <b>0.793</b>                                                                  | <b>301</b>                                                       |
|                        |                                                               |                                                   |                                                      | <b>5KCV</b>                                        | <b>0.751</b>                                                                  | <b>341</b>                                                       |
|                        |                                                               |                                                   |                                                      | <b>4EJN</b>                                        | <b>0.761</b>                                                                  | <b>355</b>                                                       |
|                        |                                                               |                                                   |                                                      | <b>4EKL</b>                                        | <b>1.099</b>                                                                  | <b>262</b>                                                       |
|                        |                                                               |                                                   |                                                      | <b>3QKM</b>                                        | <b>1.106</b>                                                                  | <b>262</b>                                                       |
|                        |                                                               |                                                   |                                                      | <b>6S9X</b>                                        | <b>0.893</b>                                                                  | <b>358</b>                                                       |
| <b>TP53</b>            | <b>393</b>                                                    | <b>3LH0</b>                                       | <b>120</b>                                           | <b>2G3R</b>                                        | <b>0.165</b>                                                                  | <b>99</b>                                                        |
|                        |                                                               |                                                   |                                                      | <b>6MXV</b>                                        | <b>0.63</b>                                                                   | <b>112</b>                                                       |
|                        |                                                               |                                                   |                                                      | <b>4CRI</b>                                        | <b>0.390</b>                                                                  | <b>115</b>                                                       |
| <b>MAPK1</b>           | <b>360</b>                                                    | <b>2OJJ</b>                                       | <b>344</b>                                           | <b>4ZXT</b>                                        | <b>0.478</b>                                                                  | <b>338</b>                                                       |
|                        |                                                               |                                                   |                                                      | <b>5LCJ</b>                                        | <b>0.36</b>                                                                   | <b>336</b>                                                       |
|                        |                                                               |                                                   |                                                      | <b>5BVE</b>                                        | <b>0.963</b>                                                                  | <b>323</b>                                                       |
|                        |                                                               |                                                   |                                                      | <b>1TVO</b>                                        | <b>0.403</b>                                                                  | <b>343</b>                                                       |
|                        |                                                               |                                                   |                                                      | <b>6GDQ</b>                                        | <b>0.228</b>                                                                  | <b>334</b>                                                       |
|                        |                                                               |                                                   |                                                      | <b>4NOS</b>                                        | <b>0.426</b>                                                                  | <b>336</b>                                                       |

|             |            |             |            |             |              |            |
|-------------|------------|-------------|------------|-------------|--------------|------------|
|             |            |             |            | <b>3W55</b> | <b>0.961</b> | <b>331</b> |
|             |            |             |            | <b>4QTA</b> | <b>0.476</b> | <b>315</b> |
|             |            |             |            | <b>6G54</b> | <b>0.407</b> | <b>339</b> |
|             |            |             |            | <b>4ZZO</b> | <b>0.294</b> | <b>336</b> |
| <b>RELA</b> | <b>551</b> | <b>1NFI</b> | <b>295</b> | <b>3GUT</b> | <b>1.207</b> | <b>272</b> |

The selected target proteins are AKT1 (protein ID: AAA36539.1), TP53(XP\_011520288.1), MAPK1(NP\_002736.3) and RELA(AAA36408.1).

Some amino acids of AKT1 in the structures of 6HHF, 5KCV, 4EJN, 4EKL, 3QKM, and 6S9X are mutated.

**Supplementary Table S2. RMSD values between the structures of the original and redocked ligands.**

| Target protein             | Ligand ID | Calculated<br>binding affinity<br>(kcal/mol) | RMSD (Å)    |             |
|----------------------------|-----------|----------------------------------------------|-------------|-------------|
|                            |           |                                              | upper bound | lower bound |
| AKT1<br><br>(PDB ID: 3O96) | IQO       | -14.4                                        | 0           | 0           |
|                            |           | -14.1                                        | 2.038       | 1.208       |
|                            |           | -13.2                                        | 4.87        | 2.612       |
| TP53<br><br>(PDB ID: 3LH0) | PGE       | -3.7                                         | 0           | 0           |
|                            |           | -3.5                                         | 5.573       | 0.89        |
|                            |           | -3.6                                         | 19.158      | 18.286      |
|                            |           | -3.3                                         | 19.503      | 18.714      |
|                            |           | -3.6                                         | 20.72       | 18.905      |
|                            |           | -3.3                                         | 20.761      | 19.858      |
|                            |           | -3.5                                         | 21.158      | 20.226      |
|                            |           | -3.2                                         | 22.298      | 21.395      |
|                            |           | -3.3                                         | 29.826      | 28.866      |
| MAPK1<br><br>PDB ID: 2OJJ  | 82A       | -8.1                                         | 0           | 0           |
|                            |           | -8.1                                         | 2.094       | 1.726       |
|                            |           | -8.1                                         | 30.624      | 27.181      |
|                            |           | -7.9                                         | 31.093      | 28.293      |
|                            |           | -7.8                                         | 20.798      | 18.637      |
|                            |           | -7.6                                         | 1.992       | 1.466       |

|  |  |             |               |               |
|--|--|-------------|---------------|---------------|
|  |  | <b>-7.6</b> | <b>28.769</b> | <b>27.233</b> |
|  |  | <b>-7.4</b> | <b>10.47</b>  | <b>6.225</b>  |
|  |  | <b>-7.4</b> | <b>21.947</b> | <b>19.505</b> |

The RMSD/upper bound represents the RMSD value matching each atom in one conformation with the same atom in the other conformation, ignoring any symmetry. The RMSD/lower bound represents the RMSD value matching each atom in one conformation with the closest atom of the same element type in the other conformation [1].

## Reference

- [1] O. Trott, A.J. Olson, AutoDock Vina: improving the speed and accuracy of docking with a new scoring function, efficient optimization, and multithreading, *Journal of computational chemistry* 31(2) (2010) 455-61.
